# Supplementary material for: Proteins and Metabolites as Indicators of Flours Quality and Nutritional Properties of Two Durum Wheat Varieties Grown in Different Italian Locations
Source: PubMed Central journal article supplement (PMC7143883; doi:10.3390/foods9030315), 2020-03-09
Supplement: foods-09-00315-s001.pdf [file foods-09-00315-s001.pdf]

## Supplementary material

**Table S1.** Meteorological conditions observed in the four locations in 2016 and 2017. The average amount of rainfall and the minimum and maximum temperatures are reported on a quarterly basis from sowing to harvest.

| Year | Site                      | Location<br>(Lat Long, Alt) | Rainfall (Average mm) |         |         | Temperature ( $T_{\min}$ - $T_{\max}$ °C) |      |         |      |         |      |
|------|---------------------------|-----------------------------|-----------------------|---------|---------|-------------------------------------------|------|---------|------|---------|------|
|      |                           |                             | Nov-Jan               | Feb-Apr | May-Jun | Nov-Jan                                   |      | Feb-Apr |      | May-Jun |      |
|      |                           |                             |                       |         |         | min                                       | max  | min     | max  | min     | max  |
| 2016 | Argelato (BO)             | 44°39' N, 11°20' E, 25 m    | 16.5                  | 41.2    | 52.3    | 3.2                                       | 11.2 | 7.1     | 16.6 | 16.1    | 24.9 |
|      | Tolentino (MC)            | 43°14' N, 13°24' E, 184 m   | 8.9                   | 27.9    | 37.1    | 5.9                                       | 12.2 | 9.3     | 17.2 | 15.8    | 25.0 |
|      | Foggia (FG)               | 41°27' N, 15°30' E, 76 m    | 10.4                  | 19.4    | 29.0    | 7.4                                       | 10.3 | 8.6     | 17.6 | 14.4    | 20.2 |
|      | S. Stefano Quisquina (AG) | 37°32' N, 13°31' E, 180 m   | 10.8                  | 13.0    | 4.8     | 8.2                                       | 16.4 | 9.5     | 15.5 | 14.6    | 24.3 |
| 2017 | Argelato (BO)             | 44°39' N, 11°20' E, 25 m    | 14.3                  | 15.7    | 23.3    | -5                                        | 12.5 | 6.0     | 20.0 | 18.0    | 30.0 |
|      | Tolentino (MC)            | 43°14' N, 13°24' E, 184 m   | 16.0                  | 26.9    | 15.3    | -1                                        | 12.2 | 6.8     | 18.0 | 15.4    | 27.0 |
|      | Foggia (FG)               | 41°27' N, 15°30' E, 76 m    | 17.0                  | 13.0    | 13.3    | -1                                        | 12.4 | 9.3     | 18.0 | 17.0    | 32.0 |
|      | S. Stefano Quisquina (AG) | 37°32' N, 13°31' E, 180 m   | 60.0                  | 30.0    | 2.3     | 8.2                                       | 17.0 | 8.0     | 22.1 | 14.0    | 36.0 |

**Table S2.** Densitometry analysis of gluten fractions of Iride and Svevo cultivated in 2016 and 2017 in four Italian regions.

| Cultivar | Fraction | Band range % | Argelato (Emilia-Romagna) |       | Tolentino (Marche) |       | Foggia (Puglia) |       | Quisquina (Sicily) |       |
|----------|----------|--------------|---------------------------|-------|--------------------|-------|-----------------|-------|--------------------|-------|
|          |          |              | 2016                      | 2017  | 2016               | 2017  | 2016            | 2017  | 2016               | 2017  |
| Iride    | HMW      | Bx_82.5 kDa  | 74.00                     | 80.39 | 75.67              | 80.95 | 71.81           | 79.83 | 74.15              | 80.54 |
|          |          | By_74.5 kDa  | 26.00                     | 19.61 | 24.33              | 19.05 | 28.19           | 20.17 | 25.85              | 19.46 |
|          | LMW      | 42 kDa       | 46.65                     | 58.59 | 55.34              | 58.14 | 54.55           | 59.16 | 52.11              | 52.19 |
|          |          | 37 kDa       | 28.04                     | 30.15 | 27.74              | 28.07 | 21.01           | 31.25 | 24.79              | 30.05 |
|          |          | 32 kDa       | 17.44                     | 7.30  | 8.92               | 5.09  | 15.35           | 6.53  | 8.26               | 10.99 |
|          |          | 31 kDa       | 7.87                      | 3.97  | 8.00               | 8.70  | 9.08            | 3.06  | 14.84              | 6.75  |
|          | Gliadins | 44 kDa       | 22.92                     | 3.64  | 17.46              | 1.31  | 23.63           | 3.50  | 22.53              | 9.70  |
|          |          | 41 kDa       | 15.20                     | 8.57  | 14.93              | 10.24 | 17.04           | 10.97 | 19.05              | 13.41 |
|          |          | 34 kDa       | 39.46                     | 28.35 | 45.23              | 26.46 | 37.78           | 26.75 | 36.57              | 24.91 |
|          |          | 33 kDa       | 2.30                      | 16.14 | 3.06               | 12.06 | 3.93            | 17.98 | 2.91               | 13.09 |
| Svevo    | HMW      | Bx_82.5 kDa  | 68.05                     | 82.35 | 65.05              | 90.14 | 75.70           | 78.53 | 67.24              | 81.70 |
|          |          | By_74.5 kDa  | 31.95                     | 17.65 | 34.95              | 9.86  | 24.30           | 21.47 | 32.76              | 18.30 |
|          | LMW      | 42 kDa       | 60.81                     | 50.26 | 58.78              | 63.44 | 64.48           | 58.47 | 64.77              | 60.02 |
|          |          | 37 kDa       | 28.29                     | 35.21 | 21.09              | 30.14 | 24.08           | 28.74 | 22.51              | 29.61 |
|          |          | 32 kDa       | 6.72                      | 8.10  | 10.69              | 3.46  | 5.19            | 8.67  | 6.47               | 5.83  |
|          |          | 31 kDa       | 4.19                      | 6.44  | 9.44               | 2.96  | 6.26            | 4.12  | 6.25               | 4.54  |
|          | Gliadins | 44 kDa       | 28.93                     | 2.57  | 26.76              | 8.17  | 27.87           | 11.96 | 27.17              | 1.63  |
|          |          | 41 kDa       | 19.44                     | 13.04 | 21.68              | 8.05  | 24.21           | 9.65  | 26.48              | 11.11 |
|          |          | 34 kDa       | 33.05                     | 24.18 | 33.43              | 23.24 | 35.09           | 23.61 | 30.85              | 23.10 |
|          |          | 33 kDa       | 0.00                      | 15.75 | 0.00               | 10.39 | 0.00            | 16.30 | 0.00               | 17.69 |
